# Supplementary material for: Development and initial validation of MedHipPro-Q: a questionnaire assessing medication management of hip fracture patients in different care settings
Source: Springer Nature journal article supplement (doi:10.1186/s12913-022-07524-2), 2022-02-22
Supplement: MOESM1 [file 20157450]

## Supplementary file 1

### Cognitive interview approach of phase II in the development of the MedHipPro-Q

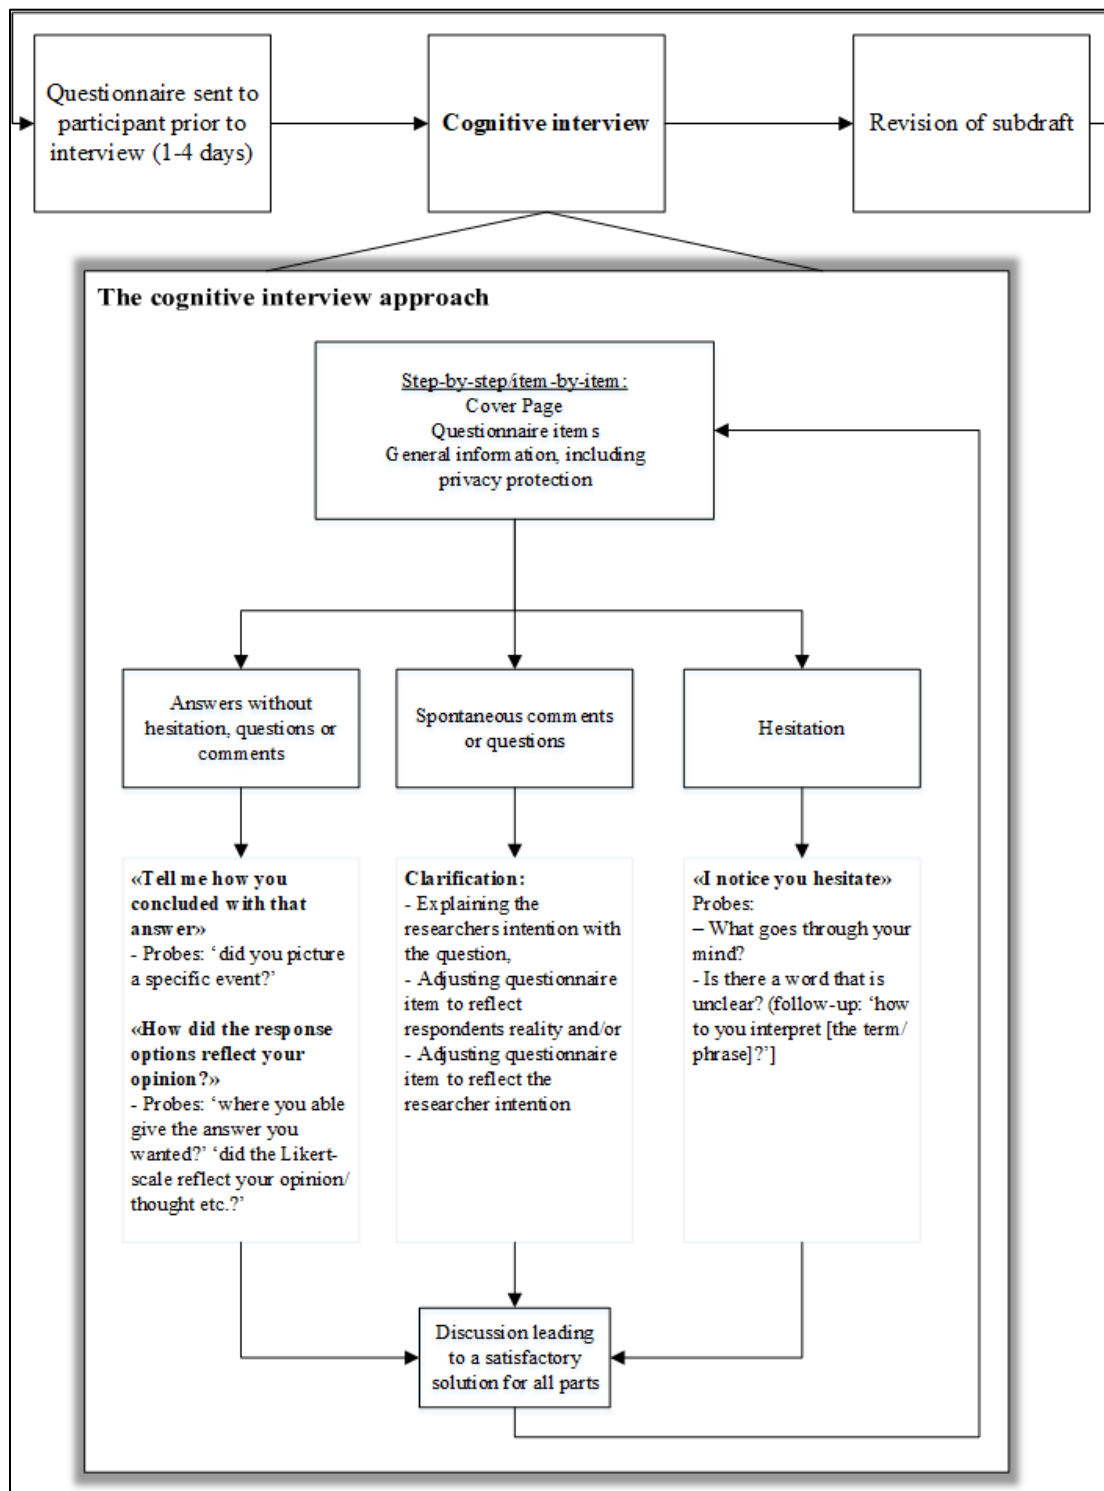

*Illustration by Ben Tore Henriksen, Hospital Pharmacies Enterprise, South-Eastern Norway, as a supplementary file to the BMC Health Services Research article "Development and initial validation of MedHipPro-Q: a questionnaire assessing medication management of hip fracture patients in different care settings"*
